# Supplementary material
Source: publisher figshare collection journal article supplement (https://rs.figshare.com/ndownloader/files/17448005)
Supplement: Supplementary file 1 [file 17448005]

| **Organism** | **Order** | **Distribution** | **Living Temperature**  **(°C)** | **Accession Number** | **Reference number in Figure2** |
| --- | --- | --- | --- | --- | --- |
| *Astronotus ocellatus* | Cichliformes | neotropical | 22-25 | KF131709 | 5 |
|  |  |  |  | KF131703 | 6 |
|  |  |  |  | JX576360 | 1 |
|  |  |  |  | KF131714 | 2 |
|  |  |  |  | KF131704 | 3 |
|  |  |  |  | JX576357 | 4 |
| *Astyanax mexicanus* | Characiformes | subtropical | 19-30 | Primary Assembly 14:11139046:11139563 |  |
| *Battrachocottus baikalensis* | Perciformes | Lake Baikal, Russia | ∽5 | AJ400358 | 1 |
|  |  |  |  | AJ400360 | 2 |
|  |  |  |  | AJ400359 | 3 |
| ***Careproctus reinhardti*** | **Perciformes** | **arctic** | -1.8; +3.7 | **MK183734** |  |
| ***Chelidonichthys lucerna*** | **Perciformes** | **Adriatic Sea** | 8-24 | **MK183746** |  |
| *Cichla kelberi* | Cichliformes | neotropical | 24-27 | FJ687588 |  |
| *Cichla monoculus* | Cichliformes | neotropical | 25-28 | KF131685 | 1 |
|  |  |  |  | JX576355 | 2 |
|  |  |  |  | KF131696 | 3 |
|  |  |  |  | JX576351 | 4 |
|  |  |  |  | KF131683 | 5 |
| *Cichlasoma labridens* | Cichliformes | tropical | 22-30 | AJ400374 |  |
| *Cyprinus carpio* | Cypriniformes | subtropical | 23-30 | AJ400450 | 1 |
|  |  |  |  | AJ400452 | 2 |
| *Danio rerio* | Cypriniformes | tropical | 18-24 | DNA chromosome GRCz11:23:43347331:43347804 |  |
| *Dissostichus mawsoni* | Perciformes | antarctic | -0.9 ± 1 | AY331110 | 1 |
|  |  |  |  | AY331109 | 2 |
| *Esox lucius* | Esociformes | subtropical | 10-28 | AJ400444 | 1 |
|  |  |  |  | AJ400446 | 2 |
| *Gadus morhua* | Gadiformes | North Atlantic and Arctic | -1.5-12 | contig710660 471:935 |  |
| ***Gasterosteus aculeatus*** | **Perciformes** | Circumarctic regions | 4-12 | AC174771 | 3 |
|  |  |  |  | AC146680 | 4 |
|  |  |  |  | AC174768 | 5 |
|  |  |  |  | AC203964 | 2 |
|  |  |  |  | groupXII 17801776:17802279 | 1 |
|  |  |  |  | AC145725 | 6 |
|  |  | **Posta Fibreno Lake, Central Italy** |  | **MK183747** | **7** |
| *Geophagus proximus* | Cichliformes | neotropical | 24-32 | KF131718 | 1 |
|  |  |  |  | JX576365 | 2 |
|  |  |  |  | KF131717 | 3 |
| *Gymnodraco acuticeps* | Perciformes | antarctic | -0.9 ± 1 | AY331107 | 2 |
|  |  |  |  | AY331108 | 1 |
| *Haplochromis chilotes* | Cichliformes | tropical | 18-24 | AB780554 | 2 |
|  |  |  |  | AB601473 | 1 |
| ***Hippoglossoides platessoides*** | **Pleuronectiformes** | **arctic** | -0.5; 2.5 | **MK183738** |  |
| ***Leptagonus decagonus*** | **Perciformes** | **arctic** | -1.8; +3.7 | **MK183737** |  |
| ***Leptoclinus maculatus*** | **Perciformes** | **arctic** | -1.8; +3.7 | **MK183739** |  |
| ***Liparis fabricii*** | **Perciformes** | **arctic** | -1.8; +3.7 | **MK183736** |  |
| ***Lycodes eudiplerostictus*** | **Perciformes** | **arctic** | -1.8; +3.7 | **MK183742** |  |
| ***Lycodes frigidus*** | **Perciformes** | **arctic** | -1.8; +3.7 | **MK183740** |  |
| ***Lycodes pallidus*** | **Perciformes** | **arctic** | -1.8; +3.7 | **MK183744** |  |
| ***Lycodes polaris*** | **Perciformes** | **arctic** | -1.8; +3.7 | **MK183743** |  |
| ***Lycodes reticulatus*** | **Perciformes** | **arctic** | -1.8; +3.7 | **MK183741** |  |
| *Notothenia coriiceps* | Perciformes | antarctic | -0.9 ± 1 | AY331103 | 1 |
|  |  |  |  | AY331104 | 2 |
| *Oreochromis niloticus* | Cichliformes | tropical | 14-33 | AJ400368 | 2 |
|  |  |  |  | AJ400370 | 3 |
|  |  |  |  | AJ400372 | 4 |
|  |  |  |  | GL83145 | 1 |
| *Oryzias latipes* | Beloniformes | subtropical | 18-24 | AJ400430 | 2 |
|  |  |  |  | AJ400431 | 1 |
|  |  |  |  | DNA chromosome 12 | 3 |
| *Poecilia formosa* | Cyprinodontiformes | subtropical | 24-27 | AJ400379 | 1 |
|  |  |  |  | AJ400382 | 2 |
|  |  |  |  | KI520361.1 | 3 |
| *Pterophyllum scalare* | Cichliformes | tropical | 24-30 | KF131740 | 1 |
|  |  |  |  | JX576372 | 2 |
|  |  |  |  | KF131739 | 3 |
| ***Sebastes mentella*** | **Perciformes** | **arctic** | 1-8 | **MK183735** |  |
| *Siniperca chuatsi* | Centrarchiformes | Amur River basin and China | 15-22 | AJ400442 | 2 |
|  |  |  |  | AJ400443 | 1 |
| *Symphysodon discus* | Cichliformes | neotropical | 25-28 | JX576400 | 1 |
|  |  |  |  | JX576393 | 2 |
| *Takifugu rubripes* | Tetraodontiformes | temperate | 16-20 | 12:24604339:24604824 |  |
|  |  |  |  | scaffold 6258 |  |
| *Tetraodon nigroviridis* | Tetraodontiformes | tropical | 24-28 | AJ312226 | 1 |
|  |  |  |  | AJ621035 | 2 |
|  |  |  |  | DNA chromosome 16:2315634:2316098 | 3 |
| ***Trematomus bernacchii*** | **Perciformes** | **antarctic** | -0.9 ± 1 | **MK183745** |  |
| *Trematomus newnesi* | Perciformes | antarctic | -0.9 ± 1 | AY331106 | 1 |
|  |  |  |  | AY331105 | 2 |
| *Xiphophorus maculatus* | Cyprinodontiformes | tropical | 18-25 | agaj01058330.1 |  |

The specie analyzed in this work are indicated in bold.
